# Supplementary material for: Thermodynamic stability and Watson–Crick base pairing in the seed duplex are major determinants of the efficiency of the siRNA-based off-target effect
Source: PubMed Central journal article supplement — Nucleic Acids Res. 2008 Nov 6;36(22):7100–9. doi: 10.1093/nar/gkn902 (PMC2602766; doi:10.1093/nar/gkn902), 2008-11-06
Supplement: gkn902_1.pdf [file gkn902_1.pdf]

**Supplementary Table S1** siRNA sequences.

| siRNA         | Passenger strand (5'→3') | Guide strand (5'→3')   |
|---------------|--------------------------|------------------------|
| siLuc-36      | CAUUCUAUCCGCGUGGAAGAUG   | UCUUCAGCGGAUAGAAUGGC   |
| siLuc-309     | CCGCGAACGACAUUUUAAAUG    | UUAUAAAUGUCGUUCGCGGGC  |
| siLuc-774     | GAUUUCGAGUCGUCUAAAUGU    | AUUAAGACGACUCGAAAUCCA  |
| siLuc2-153    | CGUACGCGGAAUACUUCGAUU    | UCGAAGUAUCCGCGUACGUG   |
| siVIM-269     | GCCAUCAACACCGAGUUCAAG    | UGAACUCGGUGUUGAUGGCGU  |
| siVIM-270     | CCAUCAACACCGAGUUCAAGA    | UUGAACUCGGUGUUGAUGGCG  |
| siVIM-596     | GAAAACACCCUGCAAUCUUUC    | GGCUUUUGUGGGACGUUAGAA  |
| siVIM-805     | GCGUGACGUACGUCAGCAAUA    | UUGCUGACGUACGUCACGCAG  |
| siVIM-812     | GUACGUCAGCAAUAUGAAAGU    | UUUCAUAUUGCUGACGUACGU  |
| siVIM-1128    | CUCGUCACCUUCGUGAAUACC    | UAUUCACGAAGGUGACGAGCC  |
| siVIM-1261    | GAACCUGAGGGAAACUAAUCU    | AUUAGUUUCCUCAGGUUCAG   |
| siOct-670     | GAGAAAGCGAACUAGCAUUGA    | AAUGCUAGUUCGCUUUCUCUU  |
| siOct-797     | GUUCGAGUAUGGUUCUGUAAC    | UACAGAACCAUACUCGAACCA  |
| siOct-821     | CGCCAGAAGGGCAAAGAUA      | AUCUUUUGCCUUCUGGGCGCC  |
| siGRK4-934    | CUUGAAGCCUGAGAAUAUUCU    | AAUAUUCUCAGGCUUCAAGUC  |
| siCLTC-2416   | GGUGAAUCCAAGUCGACUUC     | AAGUCGACUUGGAUUCACCUU  |
| siCLTC-3114   | GUGUUAUGGAGUAUAUUAACC    | UUAUAUACUCCAUAACACGU   |
| siCLTC-4819   | GACAAAGGUGGAUAAAUAAGA    | UAAUUUAUCCACCUUUGUCA   |
| siPLS3-1310   | GUUCCUGUUGACUGGAGUAAG    | UACUCCAGUCAACAGGAACUU  |
| siPLS3-1528   | GGAAGAUCUUGGAGAUGGUCA    | ACCAUCUCCAAGAUCUCCAG   |
| siPLS3-1657   | GGCAGUUGUGGAUUUAAUUGA    | AAUUAUUAUCCACAACUGCCAA |
| siCCNC-571    | GUAUCCUCCUUUCAUGAUAGC    | UAUCAUGAAAGGAGGAUACAG  |
| siKIF23-430   | GUCAUUUCAAGCUAAACGAUA    | UCGUUUAGCUUGAAAUGACCC  |
| siTUBA2-714   | CGGCCUCCCUGCGAUUUGACG    | UCAAUUCGAGGGAGGCCGUG   |
| siITGA10-2803 | CCUCAGCCUACAUCCAAUAUG    | UAUUGGAUGUAGGCUGAGGUC  |
| siMC4R-490    | GCGGGUUGGGAUCAUCAUAAAG   | UAUGAUGAUCCCAACCCGCUU  |
| siVIM-270/812 | CCAUCAACACCAUAUGAAAGU    | UUUCAUAUGGUGUUGAUGGCG  |
| siVIM-812/270 | GUACGUCAGCAGAGUUCAAGA    | UUGAACUCUGCUGACGUACGU  |
| siVIM-270m2   | CCAUCAACACCGAGUUCGAGA    | UCGAACUCGGUGUUGAUGGCG  |
| siVIM-270m3   | CCAUCAACACCGAGUUUAAGA    | UUAACUCGGUGUUGAUGGCG   |
| siVIM-270m5   | CCAUCAACACCGAGCUCAAGA    | UUGAGCUCGGUGUUGAUGGCG  |
| siVIM-270m6   | CCAUCAACACCGAAUCAAGA     | UUGAAUUCGGUGUUGAUGGCG  |
| siVIM-270m7   | CCAUCAACACCGGUUCAAGA     | UUGAACCCGGUGUUGAUGGCG  |
| siGY-441      | CAGCCACAACGUCUAUAUCAU    | CCAUGAUUAAGACGUUGUGGC  |

**Supplementary Table S2** Target sequences in psiCHECK-cm and psiCHECK-sm.

Target sequences in psiCHECK-cm.

| Target      | Target sequence (5'→3')  |
|-------------|--------------------------|
| Luc-36-cm   | GCCAUUCUAUCCGCGUGGAAGAUG |
| Luc-309-cm  | GCCC GCGAACGACAUUUUAAAUG |
| Luc-774-cm  | UGGAUUUCGAGUCGUCUAAAUGU  |
| Luc2-153-cm | CACGUACGCGGAAUACUUCGAAA  |
| VIM-269-cm  | ACGCCAUCAACACCGAGUUCAAG  |
| VIM-270-cm  | CGCCAUCAACACCGAGUUCAAGA  |

|                |                         |
|----------------|-------------------------|
| VIM-596-cm     | CCGAAAACACCCUGCAAUCUUUC |
| VIM-805-cm     | CUGCGUGACGUACGUCAGCAAUA |
| VIM-812-cm     | ACGUACGUCAGCAAUAUGAAAGU |
| VIM-1128-cm    | GGCUCGUCACCUUCGUGAAUACC |
| VIM-1261-cm    | CUGAACCUGAGGGAAACUAAUCU |
| Oct-670-cm     | AAGAGAAAGCGAACUAGCAUUGA |
| Oct-797-cm     | UGGUUCGAGUAUGGUUCUGUAAC |
| Oct-821-cm     | GGCGCCAGAAGGGCAAAGAUA   |
| GRK4-934-cm    | GACUUGAAGCCUGAGAAUAUUCU |
| CLTC-2416-cm   | AAGGUGAAUCCAAGUCGACUCC  |
| CLTC-3114-cm   | ACGUGUUAUGGAGUAUAUUAACC |
| CLTC-4819-cm   | UUGACAAAGGUGGAUAAUUAAGA |
| PLS3-1310-cm   | AAGUCCUGUUGACUGGAGUAAG  |
| PLS3-1528-cm   | CUGGAAGAUCUUGGAGAUGGUCA |
| PLS3-1657-cm   | UUGGCAGUUGUGGAUUUAAUUGA |
| CCNC-571-cm    | CUGUAUCCUCCUUUCAUGAUAGC |
| KIF23-430-cm   | GGGUCAUUUCAAGCUAAACGAUA |
| TUBA2-714-cm   | CACGGCCUCCUGCGAUUUGACG  |
| ITGA10-2803-cm | GACCUCAGCCUACAUCCAAUAUG |
| MC4R-490-cm    | AAGCGGGUUGGGAUCAUAUAG   |
| VIM-270/812-cm | CGCCAUCAACACCAUAUGAAAGU |
| VIM-812/270-cm | ACGUACGUCAGCAGAGUUCAAGA |
| VIM-270m2-cm   | CGCCAUCAACACCGAGUUCGAGA |
| VIM-270m3-cm   | CGCCAUCAACACCGAGUUUAAGA |
| VIM-270m5-cm   | CGCCAUCAACACCGAGCUCAAGA |
| VIM-270m6-cm   | CGCCAUCAACACCGAAUUCAAGA |
| VIM-270m7-cm   | CGCCAUCAACACCGGUUCAAGA  |

Target sequences in psiCHECK-sm.

| Target       | Target sequence (5' → 3') |
|--------------|---------------------------|
| Luc-36-sm    | CUUUGGAUGAAACCGGGAAGAUG   |
| Luc-309-sm   | ACUAACCCUAAUAUUUUAUUAUG   |
| Luc-774-sm   | UAGGAUGCCAUCGGUCUUAAUGU   |
| Luc2-153-sm  | AAGCGGUGCCAAGUACUUCGAAA   |
| VIM-269-sm   | CAAUGAUGCACCAGGAGUUCAAG   |
| VIM-270-sm   | AAGGAAGGGAGAGGAGUUCAAGA   |
| VIM-270-sm2  | AAUGAUGCACCAGGAGAGUUCAA   |
| VIM-596-sm   | CGUUACUCUCGGAGCAAUCUUUC   |
| VIM-805-sm   | GGUGCCCAAGGAAGUCAGCAAUA   |
| VIM-812-sm   | CUAGGUGAAACUUAUAUGAAAGU   |
| VIM-1128-sm  | GAGGCAAUGACGCGUGAAUACC    |
| VIM-1261-sm  | CAUGUCAUUACACAAACUAAUCU   |
| Oct-670-sm   | UACCUACACUAAUCUAGCAUUGA   |
| Oct-797-sm   | GCUGAAGCUAGUAGUUCUGUAAC   |
| Oct-821-sm   | CACUGAGCGGUUCAAAGAUA      |
| GRK4-934-sm  | AGGCAAGCGGCGAAGAAUAUUCU   |
| CLTC-2416-sm | CCGAGCAAGUGGUGUCGACUCC    |
| CLTC-3114-sm | CACUUGCCACUCAUAUAUUAACC   |

|                |                         |
|----------------|-------------------------|
| CLTC-4819-sm   | ACUUGCUCGAGUCAUAAUUAGA  |
| PLS3-1310-sm   | GCCAAUAUCGAUCCUGGAGUAAG |
| PLS3-1528-sm   | GGUUAUCUCUCCGAGAUGGUCA  |
| PLS3-1657-sm   | UCGUGCUGAAAGUAUUUAAUUGA |
| CCNC-571-sm    | GGUCUUCUCUCGAUCAUGAUAGC |
| KIF23-430-sm   | GAAUGCGCAACACCUAACGAUA  |
| TUBA2-714-sm   | CUAUGACCGGCACCGAUUUGACG |
| ITGA10-2803-sm | ACGUAUGAACUGGAUCCAAUAUG |
| MC4R-490-sm    | CAUCCUCUGGUUUUCAUCAUAG  |
| VIM-270m2-sm2  | AAUGAUGCACCAGGAGUUCGAGA |
| VIM-270m3-sm2  | AAUGAUGCACCAGGAGUUUAAGA |
| VIM-270m5-sm2  | AAUGAUGCACCAGGAGCUCAAGA |
| VIM-270m6-sm2  | AAUGAUGCACCAGGAAUUCAAGA |
| VIM-270m7-sm2  | AAUGAUGCACCAGGGGUUCAAGA |
| WDR82          | CUGUAGUUUCCAAGAGUUCAGCU |
| CEP350         | GACUACCAGUAUGGAGUUCAUAG |
| WBP4           | UUCUGUUCUUCAGGAGUUCACAU |
| COPB1          | UUAUAUAGAAUCUGAGUUCAUGC |
| TMEM41A        | UUCACAAGGUCAGGAGUUCAAGA |
| HSC20          | AUGACAAGGUCAGGAGUUCAAGA |
| VAPA1          | GUGGUUUUAAUAAGAGUUCAAGA |

**Supplementary Table S3** Primer sequences used for qRT-PCR.

| Gene     | Forward primer (5'→3') | Reverse primer (5'→3') |
|----------|------------------------|------------------------|
| β-actin  | CACACTGTGCCCATCTACGA   | GCCATCTCTTGCTCGAAGTC   |
| vimentin | CAGGACTCGGTGGACTTCTC   | GTCGATGTAGTTGGCGAAGC   |
| VAPA     | TTCAGGAAATGCCAAGAGGT   | TCAACAACCTGCCTCACAAGG  |
| MTPN     | TAGGTGCAGTGTGTGGAAGC   | TGCATGGAAGAAAACAGCAG   |
| PTPRF    | CTGGTTTGCAGCTGTTTTCA   | CCTCAGCAAGCTGGGATAAT   |
| MRPS16   | TTGCCCTCAACCTAGACAGG   | CGTTTCCTTCGCAGTCTCTC   |
| COPS8    | TGGGCAAAGAAGCTATGAAGA  | CAGAGGGCTGTCACACAGAG   |
| COPB1    | TGAAATGCCTGACTCCAGAA   | ATCTGGTCCCTGGTGAATTG   |
| RAB31    | CACGCTTCCACTTCACTCAA   | AAATGCCGCTTGCTAACAGT   |
| ARPC2    | CTTGAAAAATCTTCCGGCATC  | CTCCTTCCTTGCCCTCTTCT   |
| PLEKHC1  | CATGATTTGCCACAATGTCC   | CACCCTTTTGGGCTATGTGA   |
| DR1      | TGGATGTCATACCCATGAAGTG | CAAATTAGAAAAGCCAACACG  |
| WDR82    | GCCAAAGCCACTGATGTTTA   | TTTGGGTGGCAAACCTTGATT  |
| SURF4    | GTCAAGGTTGGTTGGCTGAT   | GCCAGGAGAAACAGGAACAC   |
| CALM2    | TGCAAACGGGTGTATTATCC   | AGGCAAATTGTGCCATAAGC   |
| HINT1    | GCTGATCTGGGCCTGAATAA   | ATCCCCAAAACGTGCTTAAC   |
| TRUB1    | TGTGTGCAGATGCAGAATGA   | CCAACTGCAAGGCCATTTAT   |
| BTF3L4   | ACTGGCCCTAGGAGGATTTT   | GTGCTCCCCTCAAAGCATT    |
| BECN1    | AGGTTGAGAAAGGCGAGACA   | GCTTTTGTCCACTGCTCCTC   |
| SSR1     | ATTGATGGCACAATCAGCA    | CGCATTAACAGCAGCAAAA    |
| TFP1     | GTGGTGCAATCACAGGACAC   | AGCCCAGGTGTTCAAGACAA   |

|         |                       |                      |
|---------|-----------------------|----------------------|
| TMEM30A | TTGCTTACATCGCTGTTGGA  | CTTGATGCACATGCAGATGA |
| POGK    | ACAAGGCCCATTTGACTCATC | CAGGGCAGGAGATCAGAAGT |
| HDAC2   | AGGAGGTCTGAAGAAATGTGG | TTCACCACTGTTGTCCTTGG |
| PSAP    | GGCCATCTGCCTGAATGTAA  | AACAGCCAGGGACATGTAGG |
| CAPRIN1 | TGCATGGGTCCTAATCACAC  | TTTTGCATCTTGGCTTTGTC |

**Supplementary Table S4** Effects of G:U pairing and its reversion on standard free energy change.

| Position | Parental  |                       | G:U pairing |                       | Revertant |                       |
|----------|-----------|-----------------------|-------------|-----------------------|-----------|-----------------------|
|          | Base pair | $\Delta G$ (kcal/mol) | Base pair   | $\Delta G$ (kcal/mol) | Base pair | $\Delta G$ (kcal/mol) |
| P2       | A:U       | -13.9                 | G:U         | -13.7                 | G:C       | -15.2                 |
| P3       | C:G       | -13.9                 | U:G         | -11.5                 | U:A       | -11.9                 |
| P5       | U:A       | -13.9                 | U:G         | -13.2                 | C:G       | -15.5                 |
| P6       | G:C       | -13.9                 | G:U         | -11.0                 | A:U       | -11.8                 |
| P7       | A:U       | -13.9                 | G:U         | -13.1                 | G:C       | -15.7                 |
